# Supplementary material
Source: PubMed Central journal article supplement (PMC8675123)
Supplement: mmc1.pdf [file mmc1.pdf]

Supplementary Table 1. Demographics, time from symptom onset to swabbing and cycle threshold values of diagnostic and study swabs for comparing nasopharyngeal (NP), mid-turbinate (MT) and oropharyngeal (OP) swabs

| Age | Sex | Symptoms Onset to Study Swabs (Days) | Symptom Onset to Diagnostic Swab (Days) | Diagnostic Swab Site | Diagnostic Swab Ct |       | Study NP Swab Ct |       | Study MT Swab Ct |       | Study OP Swab Ct |              |
|-----|-----|--------------------------------------|-----------------------------------------|----------------------|--------------------|-------|------------------|-------|------------------|-------|------------------|--------------|
|     |     |                                      |                                         |                      | Envelope           | RdRp  | Envelope         | RdRp  | Envelope         | RdRp  | Envelope         | RdRp         |
| 44  | M   | 9                                    | 4                                       | NP                   | N/A                | 24.15 | 30.25            | 32.55 | 32.36            | 36.53 | 26.53            | 30.03        |
| 79  | M   | 11                                   | 7                                       | Nasal                | 25.17              | 28.51 | 27.88            | 30.45 | 33.09            | 35.38 | 0                | N/A-Positive |
| 29  | F   | 15                                   | 10                                      | NP                   | N/A                | 28.16 | 24.89            | 28.26 | 32.56            | 35.38 | 31.08            | 35.2         |
| 37  | M   | 11                                   | 6                                       | Nasal                | 27.44              | 31.24 | 24.83            | 27.74 | 32.45            | 34.77 | 31.36            | 33.43        |
| 28  | M   | 8                                    | 4                                       | NP                   | N/A                | 23.16 | 31.84            | 37.2  | 30.21            | 33.64 | 28.89            | 32.14        |
| 38  | F   | 5                                    | 0                                       | Nasal                | 26.32              | 30.04 | 19.48            | 21.89 | 29.43            | 31.87 | 34.04            | 38.43        |
| 41  | M   | 10                                   | 6                                       | NP                   | 21.21              | 24.38 | 22.84            | 26.89 | 28.67            | 31.77 | 20.28            | 24.25        |
| 33  | F   | 6                                    | 2                                       | Nasal                | 16.39              | 19.93 | 28.89            | 31.73 | 29.3             | 31.62 | 32.22            | 34.89        |
| 61  | F   | 8                                    | 3                                       | Nasal                | 12.31              | 15.15 | 28.51            | 30.68 | 28.86            | 31.36 | 30.13            | 32.01        |
| 52  | M   | 9                                    | 6                                       | Nasal                | 20.56              | 24.35 | 29.34            | 32.36 | 28.29            | 31.32 | 30.39            | 33.75        |
| 41  | F   | 9                                    | 5                                       | NP                   | N/A                | 21.09 | 30.37            | 33.52 | 28.34            | 30.94 | 0                | 0            |
| 40  | F   | 19                                   | 15                                      | Nasal                | 13.24              | 16.74 | 26.95            | 30.05 | 27.04            | 30.77 | 35.82            | N/A          |
| 29  | M   | 9                                    | 4                                       | Nasal                | 13.84              | 18.21 | 20.81            | 23.85 | 27.59            | 30.46 | 23.38            | 27.11        |
| 45  | M   | 7                                    | 4                                       | Nasal                | 21.79              | 25.41 | 27.79            | 30.97 | 27.34            | 30.41 | 29.87            | 32.73        |
| 18  | M   | 7                                    | 3                                       | NP                   | 21.34              | 24.89 | 25.45            | 29.13 | 26.24            | 29.85 | 26.33            | 29.84        |
| 57  | M   | 9                                    | 5                                       | Nasal                | 20.92              | 24.34 | 22.59            | 25.95 | 26.5             | 29.84 | 23.57            | 27.22        |
| 46  | M   | 6                                    | 3                                       | Nasal                | 21.18              | 24.36 | 21.36            | 24.53 | 26.31            | 29.56 | 27.68            | 30.87        |
| 42  | M   | 10                                   | 4                                       | NP                   | N/A                | 24.15 | 27.3             | 30.64 | 25.29            | 28.82 | 23.94            | 27.72        |
| 59  | M   | 10                                   | 6                                       | Nasal                | 17.66              | 21.26 | 25.6             | 27.86 | 25.26            | 27.88 | 28.85            | 31.27        |
| 37  | M   | 8                                    | 4                                       | NP                   | N/A                | 25.87 | 0                | 0     | 22.74            | 26.31 | 0                | 0            |
| 39  | F   | 11                                   | 9                                       | Nasal                | 23.47              | 27.43 | 26.25            | 30.09 | 23.46            | 26.09 | 0                | 0            |
| 13  | F   | 11                                   | 7                                       | NP                   | 19.5               | 22.5  | 25.44            | 27.92 | 22.53            | 25.94 | 34.64            | 36.24        |
| 62  | F   | 4                                    | 1                                       | Nasal                | 26.2               | 30.93 | 15.44            | 18.66 | 18.36            | 21.75 | 26.67            | 29.92        |
| 48  | F   | 13                                   | 12                                      | Nasal                | 27.03              | 30.08 | 0                | 0     | 34.42            | 1     | 0                | 0            |
| 60  | M   | 19                                   | 15                                      | NP                   | 30.49              | 34.1  | 33.64            | 35.77 | 0                | 0     | 26.2             | 29.49        |
| 34  | F   | 7                                    | 3                                       | NP                   | N/A                | 27.94 | 29.75            | 34.92 | 0                | 0     | 30.56            | 34.84        |
| 48  | F   | 23                                   | 21                                      | Nasal                | 33.18              | 36.9  | 31               | 34.18 | 0                | 0     | 27.4             | 30.13        |
| 35  | F   | 10                                   | 5                                       | Nasal                | 29.39              | 32.71 | 30.31            | 32.64 | 0                | 0     | 26.53            | 30.22        |
| 69  | M   | 12                                   | 8                                       | Nasal                | 18.58              | 22.09 | 26.91            | 30.2  | 0                | 0     | 40.68            | N/A          |
| 43  | M   | 17                                   | 11                                      | NP                   | N/A                | 30.06 | 0                | 0     | 0                | 0     | 0                | 0            |
| 11  | M   | 7                                    | 3                                       | NP                   | 25.91              | 29.25 | 0                | 0     | 0                | 0     | 31.98            | 34.89        |
| 55  | M   | 7                                    | 2                                       | NP                   | 33.32              | 37.94 | 0                | 0     | 0                | 0     | 0                | 0            |
| 39  | F   | 12                                   | 7                                       | Nasal                | 32.39              | 34.72 | 0                | 0     | 0                | 0     | 0                | 0            |
| 39  | F   | 16                                   | 13                                      | Nasal                | 30.55              | 33.27 | 0                | 0     | 0                | 0     | 0                | 0            |
| 56  | M   | 5                                    | 0                                       | Nasal                | 34.41              | 35.91 | 0                | 0     | 0                | 0     | 0                | 0            |
| 46  | F   | 18                                   | 13                                      | Nasal                | 28.64              | 32.59 | 0                | 0     | 0                | 0     | 0                | 0            |

All patients were in the community (not hospitalized) and were tested using the Alberta ProVLab lab-developed triplex RT-PCR targeting the Envelope and RNA-dependent RNA polymerase (RdRp) SARS-CoV-2 genes with a MS2 phage control was used for all samples. Age is at the time of the study swab. N/A=not available; Ct=cycle threshold value
