# Supplementary material
Source: PubMed Central journal article supplement (PMC8675123)
Supplement: mmc2.pdf [file mmc2.pdf]

Supplementary Table 2. Demographics, time from symptom onset to swabbing and cycle threshold values of diagnostic and study swabs for comparing nasopharyngeal (NP) and oropharyngeal (OP) swabs collected in universal transport media.

| Age | Sex | Hospitalized | Symptoms Onset to Study Swabs (Days) | Symptom Onset to Diagnostic Swab (Days) | Diagnostic Swab Site | Dx Assay    | Diagnostic Swab Ct                           |                                              |              | Study Assay | Study E gene Ct |         |
|-----|-----|--------------|--------------------------------------|-----------------------------------------|----------------------|-------------|----------------------------------------------|----------------------------------------------|--------------|-------------|-----------------|---------|
|     |     |              |                                      |                                         |                      |             | Envelope (LDT and Seegene)/ Spike (Simplexa) | RNAdPol (LDT and Seegene)/ ORF1ab (Simplexa) | Nucleocapsid |             | NP swab         | OP Swab |
| 63  | F   | Y            | 7.00                                 | 0.00                                    | OP                   | LDT Duplex  | 31.83                                        | ND                                           | ND           | LDT Duplex  | 37.30           | 0.00    |
| 46  | M   | Y            | 28.00                                | 19.00                                   | OP                   | LDT Triplex | 28.76                                        | 31.55                                        | ND           | LDT Duplex  | 35.90           | 0.00    |
| 42  | F   | Y            | 13.00                                | 4.00                                    | NP                   | LDT Triplex | 18.35                                        | 21.25                                        | ND           | LDT Triplex | 33.93           | 30.17   |
| 52  | M   | N            | 5.00                                 | 1.00                                    | OP                   | LDT Duplex  | 28.99                                        | ND                                           | ND           | LDT Duplex  | 33.82           | 32.25   |
| 43  | F   | Y            | 17.00                                | 4.00                                    | OP                   | LDT Triplex | 22.71                                        | 25.72                                        | ND           | LDT Duplex  | 33.00           | 35.83   |
| 73  | M   | N            | 2.00                                 | 0.00                                    | OP                   | Seegene     | 26.54                                        | 29.16                                        | 27.31        | LDT Duplex  | 32.99           | 28.49   |
| 49  | M   | N            | 10.00                                | 7.00                                    | OP                   | LDT Duplex  | 20.82                                        | ND                                           | ND           | LDT Duplex  | 32.60           | 29.12   |
| 68  | F   | Y            | 20.00                                | 9.00                                    | OP                   | LDT Duplex  | 18.39                                        | ND                                           | ND           | LDT Triplex | 32.49           | 32.35   |
| 83  | F   | Y            | 18.00                                | 5.00                                    | OP                   | LDT Triplex | 18.62                                        | 21.8                                         | ND           | LDT Triplex | 32.39           | 0.00    |
| 81  | F   | Y            | 17.00                                | 8.00                                    | OP                   | LDT Duplex  | 32.19                                        | ND                                           | ND           | LDT Triplex | 31.55           | 0.00    |
| 45  | F   | N            | 7.00                                 | 4.00                                    | OP                   | LDT Duplex  | 22.65                                        | ND                                           | ND           | LDT Duplex  | 31.24           | 32.90   |
| 86  | M   | Y            | 18.00                                | 7.00                                    | NP                   | LDT Triplex | 20.32                                        | 22.95                                        | ND           | LDT Triplex | 30.96           | 0.00    |
| 71  | M   | Y            | 9.00                                 | 4.00                                    | NP                   | LDT Triplex | 19.83                                        | 22.6                                         | ND           | LDT Triplex | 30.93           | 27.48   |
| 81  | F   | Y            | 11.00                                | 7.00                                    | NP                   | LDT Triplex | 21.8                                         | 24.78                                        | ND           | LDT Duplex  | 30.43           | 34.48   |
| 41  | M   | Y            | 9.00                                 | 2.00                                    | NP                   | LDT Triplex | 31.3                                         | 34.81                                        | ND           | LDT Triplex | 30.37           | 23.46   |
| 73  | F   | N            | 4.00                                 | 2.00                                    | OP                   | Seegene     | 21.16                                        | 22.16                                        | 21.95        | LDT Duplex  | 30.35           | 26.88   |
| 58  | M   | Y            | 4.00                                 | 1.00                                    | ETT                  | LDT Triplex | 29.4                                         | 29.3                                         | ND           | LDT Triplex | 28.80           | 0.00    |
| 64  | M   | N            | 4.00                                 | 2.00                                    | OP                   | Seegene     | 24.53                                        | 27.22                                        | 28.24        | LDT Duplex  | 28.16           | 28.65   |
| 64  | F   | N            | 6.00                                 | 2.00                                    | OP                   | LDT Duplex  | 23.93                                        | ND                                           | ND           | LDT Duplex  | 27.67           | 32.00   |
| 72  | M   | Y            | 11.00                                | 6.00                                    | Nasal                | LDT Triplex | 18.48                                        | 21.35                                        | ND           | LDT Triplex | 27.63           | 35.25   |
| 33  | F   | N            | Unknown                              | Unknown                                 | OP                   | LDT Duplex  | 23.97                                        | ND                                           | ND           | LDT Duplex  | 27.33           | 26.37   |
| 31  | F   | Y            | 29.00                                | 21.00                                   | NP                   | LDT Triplex | 34.31                                        | 35.54                                        | ND           | LDT Triplex | 26.62           | 37.02   |
| 28  | F   | Y            | 21.00                                | 9.00                                    | NP                   | LDT Triplex | 19.83                                        | 22.65                                        | ND           | LDT Triplex | 25.46           | 0.00    |
| 67  | F   | Y            | Asymptomatic                         | Asymptomatic                            | OP                   | LDT Triplex | 17.38                                        | 19.83                                        | ND           | LDT Triplex | 23.03           | 16.68   |
| 33  | M   | Y            | 23.00                                | 23.00                                   | OP                   | LDT Triplex | 24.45                                        | 27.3                                         | ND           | LDT Triplex | 22.65           | 31.50   |
| 59  | M   | N            | 7.00                                 | 3.00                                    | OP                   | Seegene     | 21.62                                        | 25.72                                        | 25.35        | LDT Duplex  | 22.51           | 26.29   |
| 42  | F   | N            | 6.00                                 | 1.00                                    | OP                   | LDT Duplex  | 19.09                                        | ND                                           | ND           | LDT Duplex  | 21.87           | 28.45   |
| 31  | F   | Y            | 3.00                                 | 1.00                                    | OP                   | LDT Duplex  | 21.41                                        | ND                                           | ND           | LDT Triplex | 20.28           | 24.70   |
| 42  | M   | N            | 3.00                                 | 0.00                                    | OP                   | LDT Duplex  | 20.97                                        | ND                                           | ND           | LDT Duplex  | 18.99           | 21.94   |
| 51  | M   | Y            | 11.00                                | 1.00                                    | NP                   | LDT Triplex | 15.88                                        | 18.61                                        | ND           | LDT Triplex | 18.38           | 33.95   |
| 62  | M   | Y            | 7.00                                 | 4.00                                    | OP                   | LDT Triplex | 28.61                                        | 30.8                                         | ND           | LDT Duplex  | 17.23           | 26.21   |
| 68  | M   | Y            | 1.00                                 | 0.00                                    | NP                   | LDT Duplex  | 20.51                                        | ND                                           | ND           | LDT Triplex | 16.75           | 18.31   |
| 58  | M   | N            | 4.00                                 | 0.00                                    | OP                   | LDT Duplex  | 30.77                                        | ND                                           | ND           | LDT Duplex  | 16.48           | 28.06   |
| 37  | F   | Y            | 2.00                                 | 0.00                                    | OP                   | LDT Duplex  | 25.35                                        | ND                                           | ND           | LDT Triplex | 16.43           | 26.62   |
| 43  | F   | Y            | 28.00                                | 4.00                                    | NP                   | LDT Triplex | Unknown                                      | 28.25                                        | ND           | LDT Triplex | 0.00            | 32.31   |
| 58  | M   | Y            | 44.00                                | 14.00                                   | ETT                  | LDT Triplex | 25.25                                        | 28.94                                        | ND           | LDT Triplex | 0.00            | 0.00    |
| 29  | M   | Y            | 10.00                                | 4.00                                    | OP                   | LDT Triplex | 28.87                                        | 30.89                                        | ND           | LDT Triplex | 0.00            | 0.00    |
| 41  | F   | N            | 5.00                                 | 1.00                                    | OP                   | LDT Duplex  | 32.83                                        | ND                                           | ND           | LDT Duplex  | 0.00            | 36.16   |
| 74  | M   | N            | 6.00                                 | 5.00                                    | OP                   | Seegene     | 22.71                                        | 24.74                                        | 25.03        | LDT Duplex  | 0.00            | 35.33   |
| 32  | M   | N            | 4.00                                 | 0.00                                    | OP                   | LDT Duplex  | 35.99                                        | ND                                           | ND           | LDT Duplex  | 0.00            | 0.00    |
| 55  | F   | N            | 6.00                                 | 4.00                                    | OP                   | LDT Duplex  | 27.76                                        | ND                                           | ND           | LDT Duplex  | 0.00            | 36.24   |
| 60  | M   | N            | 5.00                                 | 0.00                                    | OP                   | Seegene     | 22.71                                        | 24.74                                        | 25.03        | LDT Duplex  | 0.00            | 36.91   |
| 72  | M   | Y            | 8.00                                 | 0.00                                    | OP                   | LDT Duplex  | 27.73                                        | ND                                           | ND           | LDT Duplex  | 0.00            | 0.00    |

Diagnostic RT-PCR testing was done either using the Alberta ProVlab lab-developed (LDT) Triplex RT-PCR targeting the Envelope (E) and RNA-dependent polymerase (RdRp) SARS-CoV-2 genes with a MS2 phage control, the LDT duplex (targeting E gene with MS2 control), Diasorin Simpexa Direct COVID-19 or Seegene Allplex nCoV 2019. Age is at the time of the study swab. ETT=endotracheal tube aspirate; Ct=cycle threshold value; ND= not detected by the assay. N/A=not available.
